# Supplementary material for: SeqKit: A Cross-Platform and Ultrafast Toolkit for FASTA/Q File Manipulation
Source: PubMed Central journal article supplement (PMC5051824; doi:10.1371/journal.pone.0163962), 2016-10-05
Supplement: pone.0163962.s001.pdf [file pone.0163962.s001.pdf]

# SeqKit: a cross-platform and ultrafast toolkit for FASTA/Q file manipulation – Supplementary data

Wei Shen<sup>1</sup>, Shuai Le<sup>1</sup>, Yan Li<sup>2,\*</sup> and Fuquan Hu<sup>1,\*</sup>

<sup>1</sup>Department of Microbiology, College of Basic Medical Sciences, Third Military Medical University, 30# Gaotanyan St., Shapingba District, Chongqing, China; <sup>2</sup>Medical Research Center, Southwest hospital, Third Military Medical University, 29# Gaotanyan St., Shapingba District, Chongqing, China.

## Contents

|                                                       |    |
|-------------------------------------------------------|----|
| Introduction.....                                     | 2  |
| Benchmark information.....                            | 2  |
| Softwares.....                                        | 2  |
| Datasets.....                                         | 2  |
| Platform.....                                         | 3  |
| Automatic benchmark and plotting scripts.....         | 3  |
| Benchmark of computing complement base.....           | 4  |
| Benchmark of FASTA/Q file parsing.....                | 5  |
| Datasets.....                                         | 5  |
| Tests.....                                            | 5  |
| Results.....                                          | 5  |
| Performance of SeqKit with multiple threads.....      | 6  |
| Datasets.....                                         | 6  |
| Tests.....                                            | 6  |
| Results.....                                          | 7  |
| Performance comparison with other tools.....          | 8  |
| Tests.....                                            | 8  |
| Results.....                                          | 9  |
| Performance of SeqKit on different sizes of data..... | 11 |
| Datasets.....                                         | 11 |
| Tests.....                                            | 11 |
| Results.....                                          | 11 |

## Introduction

SeqKit is a cross-platform, ultrafast and practical command-line toolkit that is usable for researchers to complete wide range of FASTA/Q file processings. SeqKit is open source and available on Github at <https://github.com/shenwei356/seqkit>, with detailed usage, examples and tutorials at <http://shenwei356.github.io/seqkit/>

## Benchmark information

### Softwares

Four tools was used for performance comparison:

- [seqkit](#). (Go). Version [v0.3.1.1](#). Compiled with Go 1.7rc5.
- [fasta\\_utilities](#). (Perl). Version [3dcc0bc](#).
- [seqmagick](#). (Python). Version 0.6.1
- [seqtk](#). (C). Version [1.1-r92-dirty](#).

A Python script [memusg](#) was used to compute running time and peak memory usage of a process.

### Datasets

All test data is available here: [seqkit-benchmark-data.tar.gz](#) (2.2G)

#### 1. dataset\_A.fa - large number of short sequences

Dataset A contains reference genomes DNA sequences of gastrointestinal tract from [NIH Human Microbiome Project: Gastrointestinal\\_tract.nuc.fsa](#) (FASTA format, ~2.7G). Rename it to dataset\_A.fa.

#### 2. dataset\_B.fa - small number of large sequences

Dataset B is Human genome from [ensembl](#).

- Genome DNA: [Homo\\_sapiens.GRCh38.dna\\_sm.primary\\_assembly.fa.gz](#) (Gzipped FASTA file, ~900M). Decompress it and rename to dataset\_B.fa (~2.9G).
- GTF file: [Homo\\_sapiens.GRCh38.84.gtf.gz](#) (~44M)
- BED file: `Homo_sapiens.GRCh38.84.bed.gz` was converted from `Homo_sapiens.GRCh38.84.gtf.gz` by [gtf2bed](#) with command:

```
$ zcat Homo_sapiens.GRCh38.84.gtf.gz | gtf2bed --do-not-sort | gzip -c >
Homo_sapiens.GRCh38.84.bed.gz
```

#### 3. dataset\_C.fq – Illumina single end reads (SE100)

Dataset C is Illumina single end (SE 100bp) reads file (~2.2G).

Summary:

```
$ seqkit stat *.fa
```

| file         | format | type | num_seqs  | sum_len       | min_len | avg_len      | max_len     |
|--------------|--------|------|-----------|---------------|---------|--------------|-------------|
| dataset_A.fa | FASTA  | DNA  | 67,748    | 2,807,643,808 | 56      | 41,442.5     | 5,976,145   |
| dataset_B.fa | FASTA  | DNA  | 194       | 3,099,750,718 | 970     | 15,978,096.5 | 248,956,422 |
| dataset_C.fq | FASTQ  | DNA  | 9,186,045 | 918,604,500   | 100     | 100          | 100         |

#### 4. Sequence ID list

Parts of sequences IDs was sampled and shuffled from original data. They were used in test of extracting sequences by ID list.

```
$ seqkit sample -p 0.3 dataset_A.fa | seqkit seq --name --only-id | shuf > ids_A.txt
$ seqkit sample -p 0.3 dataset_B.fa | seqkit seq --name --only-id | shuf > ids_B.txt
$ seqkit sample -p 0.03 dataset_C.fq | seqkit seq --name --only-id | shuf > ids_C.txt
```

Summary:

```
$ wc -l ids*.txt
 20138 ids_A.txt
    58 ids_B.txt
275467 ids_C.txt
```

#### 5. BED file

Only BED data of chromosome 19 was used in test of subsequence with BED file:

```
$ zcat Homo_sapiens.GRCh38.84.bed.gz | grep -E "^19" | gzip -c > chr19.bed.gz
```

### Platform

PC:

- CPU: Intel Core i5-3320M @ 2.60GHz, two cores/4 threads
- RAM: DDR3 1600MHz, 12GB
- SSD: 250G, SATA-3
- OS: Fedora 24 (Scientific KDE spin), Kernal: 4.6.4-301.fc24.x86\_64

Software:

- Perl: perl 5, version 22, subversion 2 (v5.22.2) built for x86\_64-linux-thread-multi
- Python: Python 2.7.11 (default, Jul 10 2016, 20:58:20) [GCC 6.1.1 20160621 (Red Hat 6.1.1-3)] on linux2

### Automatic benchmark and plotting scripts

Scripts are available at <https://github.com/shenwei356/seqkit/tree/master/benchmark> .

## Benchmark of computing complement base

To evaluate the performance of the algorithm for complementary base, a test was performed. Go source code is hosted at [Github Gist](#) and also in S2\_File.zip.

**Table A.** Benchmark result of computing complement base.

| Tests                                                  | Iterations | Time/operation    |
|--------------------------------------------------------|------------|-------------------|
| BenchmarkCheckLetterWithMap-4                          | 2000000000 | 0.20 ns/op        |
| BenchmarkCheckLetterWithSwitch-4                       | 1000000000 | 0.03 ns/op        |
| BenchmarkCheckLetterWithSwitchWithLargerAlphabetSize-4 | 2000000000 | 0.02 ns/op        |
| <b>BenchmarkCheckLetterWithSlice-4</b>                 | 2000000000 | <b>0.01 ns/op</b> |

# Benchmark of FASTA/Q file parsing

## Datasets

Previously described dataset A, B and C.

## Tests

*Source code is hosted at [Github](#) and also in [S2\\_File.zip](#). Tests were repeated 5 times and average time and peak memory were used for plotting. All files were readed once before tests beginning to minimize the influence of page cache.*

*Note that seqtk does not support wrapped (fixed line width) output, so SeqKit uses “-w 0” to disable output wrapping.*

*Computation results were checked by file MD5 digest to ensure accuracy, which are available in corresponding result files.*

## Results

See figure 1 in manuscript.

# Performance of SeqKit with multiple threads

## Datasets

Same as previous datasets.

## Tests

Similar to previous tests. *Source code is hosted at [Github](#) and also in [S2\\_File.zip](#).*

### 1. Reverse Complement

[Commands](#)

### 2. Extracting sequences by ID list

[Commands](#)

### 3. Sampling by number

[Commands](#)

### 4. Removing duplicates by sequence content

[Commands](#)

### 5. Subsequence with BED file

[Commands](#)

# Results

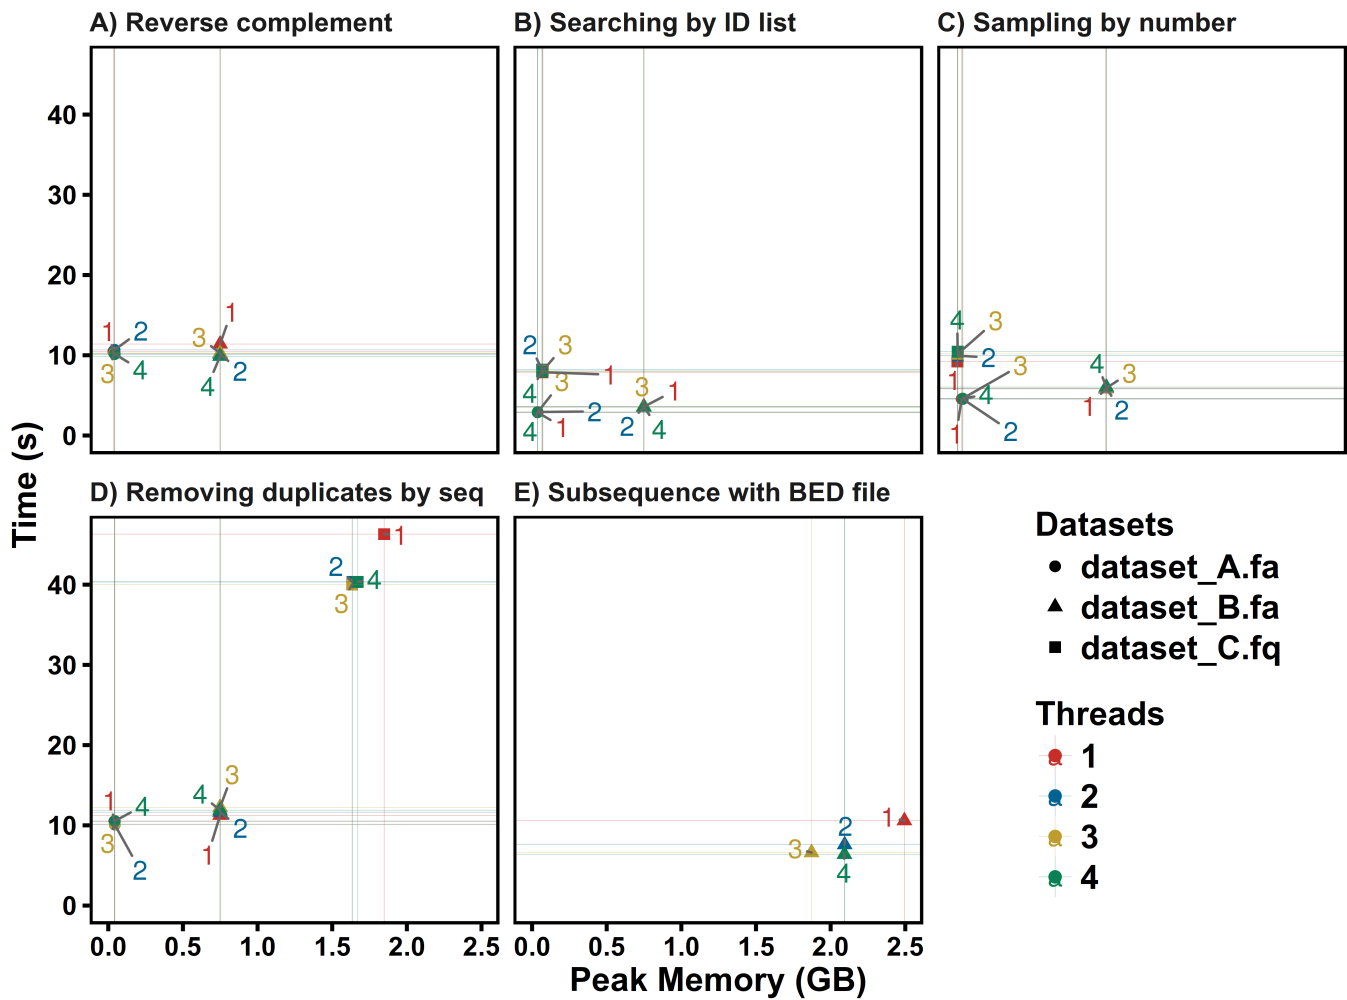

Figure A. Performances of SeqKit with multiple threads in five manipulations of FASTA/Q files. All tests were repeated three times and average time and peak memory were used for plotting.

# Performance comparison with other tools

## Tests

To evaluate the performance of SeqKit, several tests of common manipulations on FASTA/Q were performed. All tests were repeated 3 times and average time and peak memory were used for plotting. All files were read once before tests beginning to minimize the influence of page cache.

*Note that output sequences of all softwares were not wrapped to fixed length.*

*Computation results were checked by file MD5 digest and sequences statistics to ensure accuracy, which are available in corresponding result files.*

Source code is hosted at [Github](#) and also in [S2\\_File.zip](#).

### 1. Reverse Complement

revcom\_bigo ([source](#), [binary](#), compiled with Go 1.7rc5), a tool also written in Go using package [biogo](#) (Version [7ebd71b](#)) is also used for comparison of FASTA file parsing performance.

*Note that some softwares (fasta\_utilities and biogo) have different converting rules of computing complement sequence on ambiguous bases, therefore the results are different from others.*

[Commands](#)

### 2. Extracting sequences by ID list

[Commands](#)

### 3. Sampling by number

*Note that different softwares have different sampling strategies, the peak memory depends on size of sampled sequences and the results may not be the same.*

[Commands](#)

### 4. Removing duplicates by sequence content

[Commands](#)

### 5. Subsequence with BED file

[Commands](#)



# Results

**Table B.** Benchmark result of five manipulations

| test                          | dataset      | app             | time_mean | time_stdev | mem_mean | mem_stdev |
|-------------------------------|--------------|-----------------|-----------|------------|----------|-----------|
| A) Reverse complement         | dataset_A.fa | biogo           | 107.73    | 1.35       | 31496    | 841       |
| A) Reverse complement         | dataset_A.fa | fasta_utilities | 16.91     | 0.28       | 52022    | 544       |
| A) Reverse complement         | dataset_A.fa | seqkit          | 10.93     | 0.58       | 44082    | 122       |
| A) Reverse complement         | dataset_A.fa | seqmagick       | 57.15     | 0.23       | 50841    | 1385      |
| A) Reverse complement         | dataset_A.fa | seqtk           | 8.90      | 0.12       | 7533     | 37        |
| A) Reverse complement         | dataset_B.fa | biogo           | 94.75     | 0.36       | 1325084  | 68795     |
| A) Reverse complement         | dataset_B.fa | fasta_utilities | 24.02     | 0.37       | 1255725  | 62        |
| A) Reverse complement         | dataset_B.fa | seqkit          | 9.90      | 0.37       | 785510   | 115       |
| A) Reverse complement         | dataset_B.fa | seqmagick       | 64.00     | 0.29       | 1384210  | 89700     |
| A) Reverse complement         | dataset_B.fa | seqtk           | 9.63      | 0.06       | 244844   | 23        |
| B) Searching by ID list       | dataset_A.fa | fasta_utilities | 9.65      | 0.11       | 52265    | 494       |
| B) Searching by ID list       | dataset_A.fa | seqkit          | 2.88      | 0.01       | 39518    | 114       |
| B) Searching by ID list       | dataset_A.fa | seqmagick       | 38.57     | 0.57       | 38998    | 1332      |
| B) Searching by ID list       | dataset_A.fa | seqtk           | 10.73     | 0.06       | 9901     | 1         |
| B) Searching by ID list       | dataset_B.fa | fasta_utilities | 12.19     | 0.13       | 1255814  | 7         |
| B) Searching by ID list       | dataset_B.fa | seqkit          | 3.53      | 0.06       | 785308   | 122       |
| B) Searching by ID list       | dataset_B.fa | seqmagick       | 42.77     | 0.29       | 977886   | 69        |
| B) Searching by ID list       | dataset_B.fa | seqtk           | 13.02     | 0.10       | 244820   | 67        |
| B) Searching by ID list       | dataset_C.fq | fasta_utilities | 86.42     | 2.58       | 77085    | 87        |
| B) Searching by ID list       | dataset_C.fq | seqkit          | 8.26      | 0.02       | 70129    | 905       |
| B) Searching by ID list       | dataset_C.fq | seqmagick       | 237.81    | 6.33       | 52580    | 76        |
| B) Searching by ID list       | dataset_C.fq | seqtk           | 6.16      | 0.12       | 39950    | 19        |
| C) Sampling by number         | dataset_A.fa | seqkit          | 4.60      | 0.17       | 48717    | 81        |
| C) Sampling by number         | dataset_A.fa | seqmagick       | 38.57     | 1.88       | 543829   | 8690      |
| C) Sampling by number         | dataset_A.fa | seqtk           | 4.13      | 0.04       | 1078777  | 1425      |
| C) Sampling by number         | dataset_B.fa | seqkit          | 5.90      | 0.19       | 1056069  | 73        |
| C) Sampling by number         | dataset_B.fa | seqmagick       | 42.59     | 1.00       | 2987453  | 31663     |
| C) Sampling by number         | dataset_B.fa | seqtk           | 5.97      | 0.34       | 2817729  | 33        |
| C) Sampling by number         | dataset_C.fq | seqkit          | 9.69      | 0.11       | 13405    | 912       |
| C) Sampling by number         | dataset_C.fq | seqmagick       | 284.56    | 4.89       | 3740949  | 36        |
| C) Sampling by number         | dataset_C.fq | seqtk           | 4.98      | 0.16       | 501608   | 42        |
| D) Removing duplicates by seq | dataset_A.fa | seqkit          | 10.19     | 0.24       | 45918    | 128       |
| D) Removing duplicates by seq | dataset_A.fa | seqmagick       | 49.98     | 0.48       | 54606    | 472       |
| D) Removing duplicates by seq | dataset_B.fa | seqkit          | 11.12     | 0.29       | 785329   | 166       |
| D) Removing duplicates by seq | dataset_B.fa | seqmagick       | 62.16     | 1.22       | 1033625  | 83        |
| D) Removing duplicates by seq | dataset_C.fq | seqkit          | 40.22     | 0.18       | 1656700  | 152410    |
| D) Removing duplicates by seq | dataset_C.fq | seqmagick       | 469.96    | 12.62      | 2737658  | 60        |
| E) Subsequence with BED file  | dataset_B.fa | seqkit          | 7.27      | 0.17       | 2218930  | 97457     |
| E) Subsequence with BED file  | dataset_B.fa | seqtk           | 6.42      | 0.11       | 246216   | 53        |

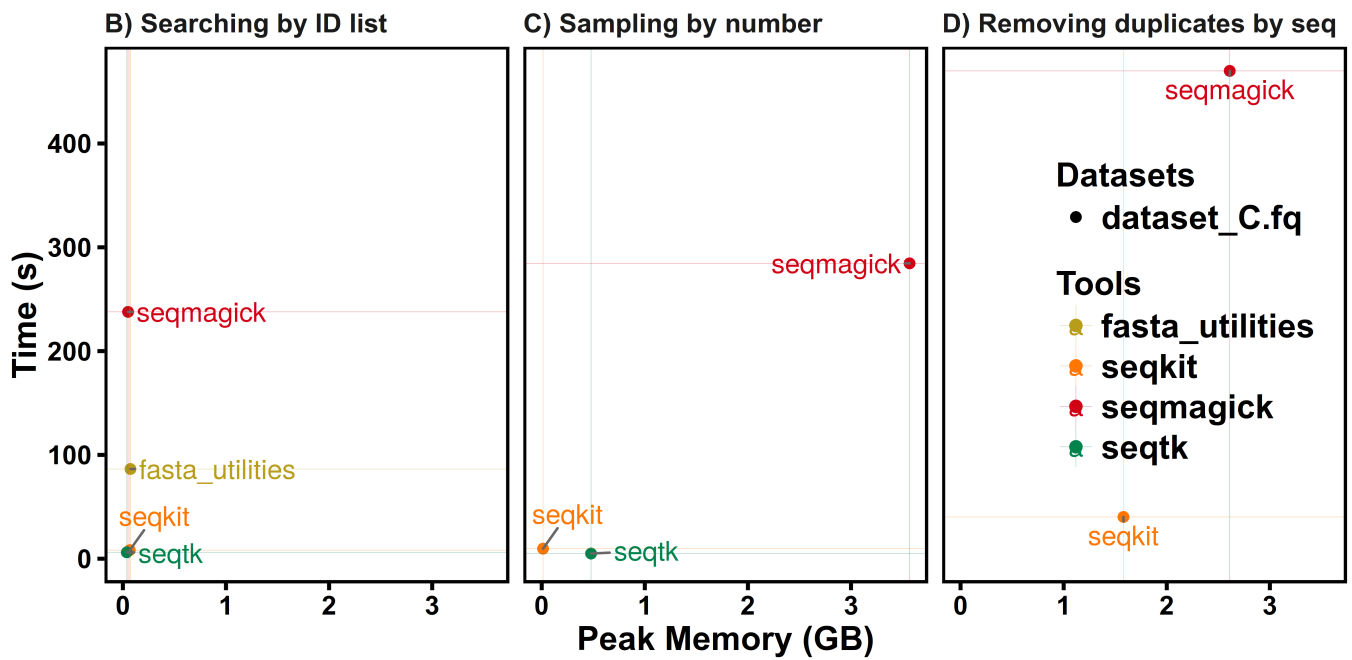

**Figure B. Performance comparison on three manipulations of FASTQ file.** All tests were repeated three times and average time and peak memory were used for plotting.

See Figure 2 in manuscript for performance comparison on three manipulations of FASTA files.

# Performance of SeqKit on different sizes of data

## Datasets

Sequences of Human genome chromosome 1 was extracted from dataset\_B.fa as data of 1X (length: 248,956,422 bp, file size: 241.4Mb)

```
$ seqkit head -n 1 dataset_B.fa > 1X.fa
```

And it's replicated by  $N$  times as data of  $NX$ :

```
$ cat 1X.fa 1X.fa > 2X.fa
```

```
$ cat 2X.fa 2X.fa > 4X.fa
```

```
...
```

At last, rename the sequence identifiers so they could be rightly indexed.

```
for f in *X.fa; do seqkit rename $f > $f.re; mv $f.re $f; done
```

## Tests

Four tests were performed. *Source code is hosted at [Github](#) and also in S2\_File.zip.*

### 1. Reverse Complement

[Commands](#)

### 2. Removing duplicates by sequence content

[Commands](#)

### 3. Shuffling

[Commands](#)

### 4. Sorting by length

[Commands](#)

## Results

See Figure 3 in manuscript.
